# Supplementary material
Source: Springer Nature journal article supplement (https://www.springermedizin.de/resource/supplementary/12935_2003_34_MOESM3_ESM.pdf/9540904)
Supplement: MOESM3 [file 9540904]

CONSENSUS

NCIVQTTEWSPCKTCG

|                   |     |                                 |             |         |     |
|-------------------|-----|---------------------------------|-------------|---------|-----|
| CCN3 (NOV)        | 205 |                                 | NCIEQTTEWTA | CSKSCG  | 221 |
| CCN2 (CTGF)       | 198 |                                 | NCLVQTTEWSA | CSKTCG  | 214 |
| CCN1 (CYR61)      | 196 | neliavgkgsslkrlpvfgmepriylplqqg | KCIVQTTSWSQ | CSKTCG  | 244 |
| CCN4 (WISP1/ELM1) | 215 |                                 | NCIAYTSPWSP | CSSTSCG | 231 |
| CCN5 (WISP2/COP1) | 193 |                                 | PCPEWSTAWGP | CSSTTCG | 209 |
| CCN6 (WISP3)      | 188 | lstsyktmpayrnlpliwkk            | KCLVQATKWTP | CSRTTCG | 224 |

CONSENSUS

MGISTRVTNENAQCRMEKETRLCMVRPC DQDI TIK KGKK

|                   |     |               |           |        |      |     |     |         |     |
|-------------------|-----|---------------|-----------|--------|------|-----|-----|---------|-----|
| CCN3 (NOV)        | 222 | MGFSTRVTNRNRQ | CEMLKQTRL | CMVRPC | EQEP | eqp | TDK | KGKK    | 263 |
| CCN2 (CTGF)       | 215 | MGISTRVTNDNAS | CRLEKQSRL | CMVRPC | EADL | ee  | NIK | KGKK    | 255 |
| CCN1 (CYR61)      | 245 | TGISTRVTNDNPE | CRLVKETRI | CEVRPC | GQPV | ys  | SLK | KGKK    | 285 |
| CCN4 (WISP1/ELM1) | 232 | LGVSTRISNVNAQ | CWPEQESRL | CNLRPC | DVDI | ht  | LIK | AGKK    | 272 |
| CCN5 (WISP2/COP1) | 210 | LGMATRVSNONRF | CRLETQRRL | CLSRPC |      | pps | rg  |         | 242 |
| CCN6 (WISP3)      | 225 | MGISNRVTNENS  | CEMRKEKRL | CYIQPC | DSNI | lk  | TIK | ip KGKT | 267 |

CONSENSUS

CLRTKK KPVKFTFSGCTSTKTYKPKFCGVCMDGRCCTPHKTKTIQV

|                   |     |        |    |           |       |           |        |     |     |     |            |            |       |     |
|-------------------|-----|--------|----|-----------|-------|-----------|--------|-----|-----|-----|------------|------------|-------|-----|
| CCN3 (NOV)        | 264 | CLRTKK | sl | KAIHLQFKN | CTSLH | TYKPRF    | CGV    | CS  | DGR | CC  | TPHNTKTIQA | 311        |       |     |
| CCN2 (CTGF)       | 256 | CIRTPK | is | KPIKFELSG | CTSMK | TYRAKF    | CGV    | CT  | DGR | CC  | TPHRTTTLPV | 303        |       |     |
| CCN1 (CYR61)      | 286 | CSKTKK | sp | EPVRFTYAG | CLSV  | KKYRPKY   | CGS    | C   | V   | DGR | CC         | TPQLTRTVKM | 333   |     |
| CCN4 (WISP1/ELM1) | 273 | CLAVYQ | pe | ASMNFTLAG | CI    | STRSYQPKY | CGV    | C   | M   | DNR | CC         | IPYKSKTIDV | 320   |     |
| CCN5 (WISP2/COP1) | 243 |        | rs |           |       |           |        |     |     |     |            | 244        |       |     |
| CCN6 (WISP3)      | 268 | CQPTFQ | ls | KAEKQVFSG | CS    | STQS      | YKPTFC | CGI | CL  | DKR | CC         | IPNKS      | KMITI | 315 |

CONSENSUS

EFQC P DGETFKKNVMWINTCTCHYNCNPND

|                   |     |        |      |                 |    |      |    |      |      |              |            |     |
|-------------------|-----|--------|------|-----------------|----|------|----|------|------|--------------|------------|-----|
| CCN3 (NOV)        | 312 | EFQCsP |      | GQIVKKPVMVIGT   | CT | CHTN | CP | KNNE | afl  | gele         | lkttrgkm   | 357 |
| CCN2 (CTGF)       | 304 | EFKCP  |      | DGEVMKKNMMFIKT  | CA | CHYN | CP | GDND | ifes | lyyr         | kmygdma    | 349 |
| CCN1 (CYR61)      | 334 | RFRCE  |      | DGETFSKNVMMIQS  | CK | CNYN | CP | HANE | afp  | fyr          | lfndihkfrd | 381 |
| CCN4 (WISP1/ELM1) | 321 | SFQCP  |      | DGLGFSRQVLWINAC | F  | CNLS | CR | NPND | ifad | lesypdfseian |            | 367 |
| CCN5 (WISP2/COP1) | 245 |        |      |                 |    |      |    |      | pqn  | saf          |            | 250 |
| CCN6 (WISP3)      | 316 | QFDC   | PnEG | SFKWKMLWITS     | CV | QRN  | CR | EPGD | ifs  |              |            | 349 |
